# 1 Constraints on the Efficiency of Electromicrobial Production

2 Farshid Salimijazi<sup>a</sup>, Jaehwan Kim<sup>b,c</sup>, Alexa Schmitz<sup>a</sup>, Richard Grenville<sup>d</sup>, Andrew  
3 Bocarsly<sup>b</sup>, and Buz Barstow<sup>\*a</sup>

4 <sup>a</sup>*Department of Biological and Environmental Engineering, Cornell University, Ithaca, NY 14853, USA*

5 <sup>b</sup>*Department of Chemistry, Princeton University, Princeton, NJ 08540, USA*

6 <sup>c</sup>*Present Address: Department of Chemistry and Chemical Biology, Cornell University, Ithaca, NY 14853,*  
7 *USA*

8 <sup>d</sup>*Philadelphia Mixing Solutions Ltd., Palmyra, PA 17078, USA*

9 June 25, 2020

## 10 Abstract

11 Electromicrobial production technologies (EMP) aim to combine renewable electricity and micro-  
12 bial metabolism. We have constructed molecular to reactor scale models of EMP systems using  
13 H<sub>2</sub>-oxidation and extracellular electron transfer (EET). We predict the electrical-to-biofuel con-  
14 version efficiency could rise to  $\geq 52\%$  with *in vivo* CO<sub>2</sub>-fixation. H<sub>2</sub> and EET-mediated EMP  
15 both need reactors with high surface areas. H<sub>2</sub>-diffusion at ambient pressure requires areas 20 to  
16 2,000 times that of the solar photovoltaic (PV) supplying the system. Agitation can reduce this  
17 to less than the PV area, and the power needed becomes negligible when storing  $\geq 1.1$  megawatts.  
18 EET-mediated systems can be built that are  $\leq 10$  times the PV area and have minimal resistive  
19 energy losses if a conductive extracellular matrix (ECM) with a resistivity and height seen in nat-  
20 ural conductive biofilms is used. The system area can be reduced to less than the PV area if the  
21 ECM conductivity and height are increased to those of conductive artificial polymers. Schemes  
22 that use electrochemical CO<sub>2</sub>-fixation could achieve electrical-to-fuel efficiencies of almost 50%  
23 with no complications of O<sub>2</sub>-sensitivity.

## 24 1 Introduction

25 We are moving towards a world of plentiful renewable electricity [1–3]. However, to enable high  
26 penetration of renewables onto the grid, energy storage with a capacity thousands of times greater

---

\*Corresponding author

27 than today's will be essential [4–7]. Despite significant advances in electrified transportation, the  
28 need for hydrocarbons in many applications like aviation could persist and even grow for decades  
29 to come [3]. Likewise, the need to sequester tens of gigatonnes of CO<sub>2</sub> per year will also con-  
30 tinue to grow [8, 9]. Electromicrobial production (EMP) technologies that combine biological and  
31 electronic components have the potential to use renewable electricity to power the capture and  
32 sequestration of atmospheric CO<sub>2</sub> and convert it into high-density, non-volatile infrastructure-  
33 compatible transportation fuels [7, 10–12].

34 One of the most successful demonstrations of electromicrobial production to date, the Bionic  
35 Leaf [13, 14], is capable of converting solar power to the biofuel isopropanol at efficiencies ex-  
36 ceeding the theoretical maximum of C<sub>3</sub> and C<sub>4</sub> photosynthesis [15, 16]. If coupled to some of the  
37 most efficient Si or GaAs solar photovoltaics (PVs) [17], the Bionic Leaf could even outperform  
38 cyanobacterial photosynthesis, the most efficient form found in nature [18]. However, the energy  
39 storage cost of photosynthesis is ultra-low [19, 20]. Any system that aims to supplant photosyn-  
40 thesis will need to dramatically exceed its efficiency, its convenience and preferably both.

41 To date, no one has systematically explored the constraints on the efficiency of electromicrobial  
42 production systems. Here we present a model for comparing the theoretical efficiencies of systems  
43 that supply electrons to metabolism by either H<sub>2</sub>-oxidation [13, 14, 21, 22] or through a conductive  
44 extracellular matrix (ECM) by extracellular electron transfer (EET) [23]; employ *in vivo* enzy-  
45 matic, or *ex vivo* electrochemical CO<sub>2</sub> fixation [24]; and transform fixed carbon to the biofuels  
46 isopropanol [25] or butanol [20–22]. This analysis lets us calculate the maximum theoretical effi-  
47 ciency of each system and gives a roadmap for how to achieve it.

## 48 Theory, Results and Discussion

### 49 General Theory

50 **Figs. 1A** and **1B** show simplified schematics of electromicrobial production systems with *in vivo*  
51 and *ex vivo* CO<sub>2</sub>-fixation, respectively. In **Fig. 1A** a microbe absorbs electricity to generate re-  
52 ducing equivalents needed to enzymatically fix CO<sub>2</sub> *in vivo* and synthesize an energy storage  
53 molecule like polyhydroxybutyrate (PHB) or a hydrocarbon fuel. In **Fig. 1B** CO<sub>2</sub> is first elec-  
54 trochemically reduced to a short-chain hydrocarbon like formate or formic acid *ex vivo* [27–29].  
55 A microbe in the second cell absorbs electricity and further reduces and concatenates the initial  
56 fixation product to a longer-chain carbon compound. In both cases, electricity is absorbed into  
57 metabolism by either H<sub>2</sub>-oxidation (H<sub>2</sub>-mediated electromicrobial production; H<sub>2</sub>-EMP) or EET  
58 (EET-mediated electromicrobial production; EET-EMP) **Fig. 1C**. A complete list of symbols  
59 used in this article is included in **Table S1**.

60 We define the electrical energy conversion efficiency as the rate of energy storage molecule pro-  
61 duction,  $\dot{N}_{\text{fuel}}$ , multiplied by the energy content per molecule,  $E_{\text{fuel}}$ , relative to the total electrical  
62 power input,

$$\eta_{\text{EF}} = \dot{N}_{\text{fuel}} E_{\text{fuel}} / P_{\text{e, total}}. \quad (1)$$

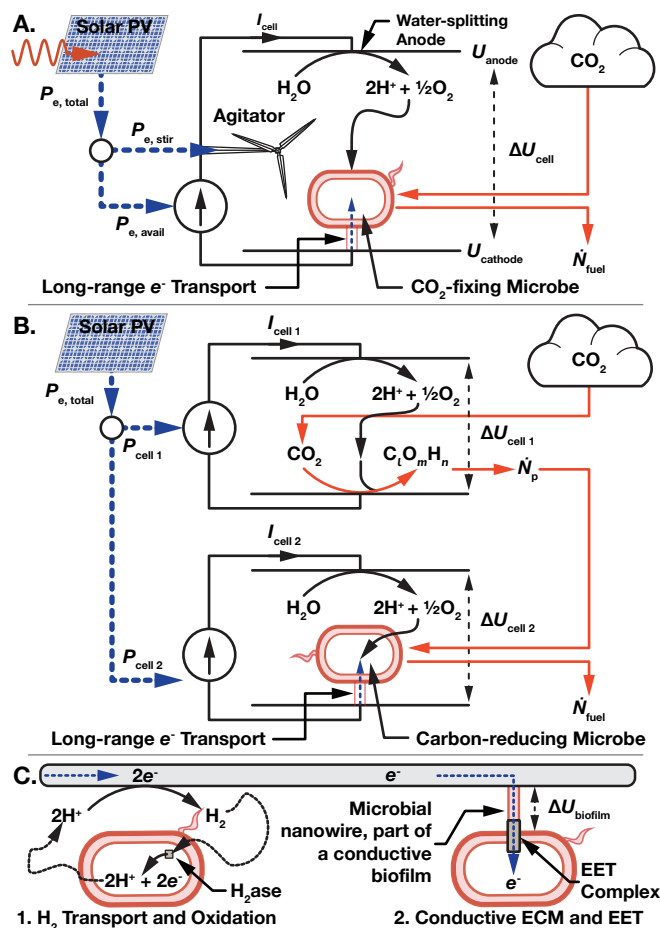

Figure 1: Overview of electromicrobial production technologies. (A) A microbe absorbs electrical power,  $P_{e, avail}$ , through  $H_2$ -oxidation or through a conductive extracellular matrix (ECM) by extracellular electron transfer (EET) to power  $CO_2$ -fixation and biofuel production at a rate  $N_{fuel}$ . The total electrical power is used to drive a current,  $I_{cell}$ , across a whole-cell voltage,  $\Delta U_{cell}$ , and can also be used to power an agitator. (B) The electrical power is split between two electrochemical cells. In the first  $CO_2$  is reduced to a short chain hydrocarbon like formic acid at a rate  $N_p$ . The primary fixation product is then concatenated in the second cell by a  $H_2$ -oxidizing or electroactive microbe. (C) Electrons are transported to metabolism by either (1) diffusion or stirring of  $H_2$  and oxidation by a hydrogenase ( $H_2ase$ ) enzyme, or (2) across a conductive ECM and transport into an electroactive cell by a membrane-spanning EET complex. A bias voltage  $\Delta U_{biofilm}$  is required to drive current across the ECM.

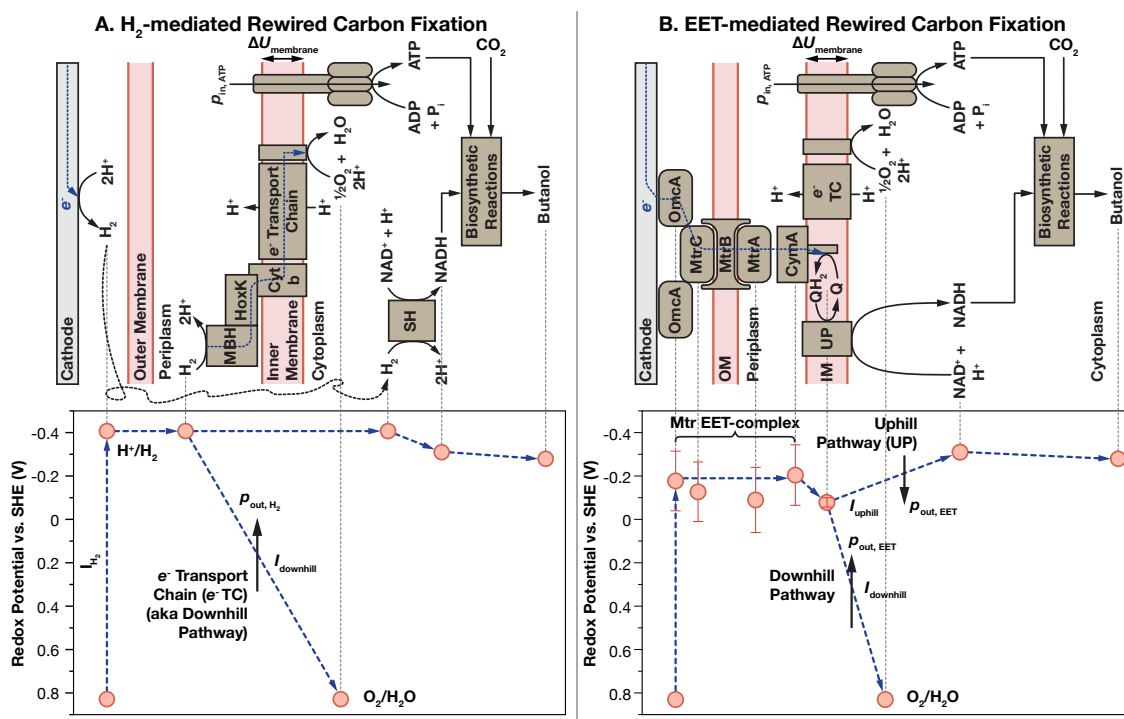

Figure 2: Energy landscapes for electromicrobial production. (A) In  $H_2$ -mediated electromicrobial production, the incoming  $H_2$ -current is used to directly reduce  $NAD(P)H$  or Ferredoxin (not shown), or is diverted into the conventional electron transport chain for ATP synthesis. For each electron sent downhill to reduce  $O_2$  and  $H^+$  to  $H_2O$ ,  $p_{out, H_2}$  are pumped across the inner membrane. To synthesize an ATP molecule,  $p_{in, ATP}$  protons are released through the ATP synthase. (B) In Extracellular Electron Transfer (EET)-mediated electromicrobial production the incoming current is split between the uphill and downhill pathways. For each electron sent downhill,  $p_{out, EET}$  protons are pumped across the inner membrane. Midpoint redox potentials for the Mtr EET complex components are from Firer-Sherwood *et al.* [26].

## 63 $H_2$ -mediated Electromicrobial Production is Already Optimized but can 64 be Improved by Swapping Out $CO_2$ -fixation

65 Estimating the efficiency of *in vivo*  $CO_2$ -fixation (Fig. 1A) comes down to estimating  $\dot{N}_{fuel}$  as  
66 a function of the electrical power available for electrochemistry,  $P_{e, avail}$ ; the voltage across the  
67 electrochemical cell,  $\Delta U_{cell}$ ; and the number of electrons needed to generate the  $NAD(P)H$ , Ferredoxin (Fd), and ATP for synthesis of a single fuel molecule from  $CO_2$ ,  $\nu_{ef}$  ( $e =$  elementary charge)  
68 (SI Text 1),  
69

$$\dot{N}_{fuel} \leq P_{e, avail} / (e \nu_{ef} \Delta U_{cell}). \quad (2)$$

70 Therefore, the overall electrical to fuel efficiency for an *in vivo*  $CO_2$ -fixation scheme,

$$\eta_{EF} \leq E_{fuel} / (e \nu_{ef} \Delta U_{cell}). \quad (3)$$

71  $\nu_{ef}$  can be estimated from molecular models of electron uptake. A schematic of the *Ralstonia eu-*  
72 *trophia*  $H_2$ -oxidation machinery (used by references [13, 14, 21]) is shown in Fig. 2A. The low

73 redox potential of  $H_2$  ( $U_{H_2}$ ) enables direct reduction of NADH by the cytosolic nickel-iron Solu-  
74 ble Hydrogenase (SH) (*R. eutropha* uses NADH rather than NADPH for  $CO_2$ -fixation) [30, 31].  
75 While the *R. eutropha* genome does not code for any Fd-reducing di-iron hydrogenases, these  
76 could be readily added to it [32–34]. Thus, the microbe simply has to oxidize a number of  $H_2$   
77 molecules equal to the sum of NADH and Fd that it needs to synthesize a fuel molecule (the  
78 number of electrons needed is just double the number of  $H_2$ ).

79 ATP is generated by injection of electrons from  $H_2$ -oxidation by the Membrane-Bound Hydroge-  
80 nase (MBH) into the inner membrane electron transport chain [30, 31]; quantized energy trans-  
81 duction by proton pumping against the transmembrane voltage,  $\Delta U_{\text{membrane}}$ ; reduction of a ter-  
82 minal electron acceptor at a redox potential  $U_{\text{acceptor}}$ ; and further quantized energy transduction  
83 by proton release through the ATP synthase and ATP regeneration.

84 Therefore, the number of electrons needed to synthesize a single fuel molecule through  $H_2$ -oxidation  
85 is (a full derivation is included in **SI Text 2**) ( $\nu_{f, \text{NADH}}$ ,  $\nu_{f, \text{Fd}}$ , and  $\nu_{f, \text{ATP}}$  are the number of NAD(P)H,  
86 Fd and ATP needed for synthesis of a single fuel molecule respectively),

$$\begin{aligned} \nu_{\text{ef}, H_2} = & \\ & 2\nu_{f, \text{NADH}} + 2\nu_{f, \text{Fd}} \\ & + \nu_{f, \text{ATP}} \frac{\text{ceil}(\Delta G_{\text{ATP}/\text{ADP}}/e\Delta U_{\text{membrane}})}{\text{floor}((U_{H_2} - U_{\text{acceptor}})/\Delta U_{\text{membrane}})}. \end{aligned} \quad (4)$$

87 These equations are numerically solved with the REWIREDCARBON package using estimates for  
88 the NAD(P)H, ATP and Fd requirements for isopropanol and 1-butanol synthesis (**Fig. S2**)  
89 from  $CO_2$  fixed by the known natural  $CO_2$ -fixation cycles and the synthetic CETCH cycle [35]  
90 in **Table S2**.

91 The biggest source of uncertainty in the efficiency estimate is the transmembrane voltage ( $\Delta U_{\text{membrane}}$ ).  
92 At the time of writing we are unaware of any direct measurement of  $\Delta U_{\text{membrane}}$  in *R. eutropha*  
93 or the electroactive microbe *Shewanella oneidensis*. Therefore, in **Fig. 3** we present a range of  
94 efficiency estimates for  $\Delta U_{\text{membrane}} = 80$  mV (BioNumber ID (BNID) 104082 [36]) to 270 mV  
95 (BNID 107135), with a central value of 140 mV (BNIDs 109774, 103386, 109775). Counterintu-  
96 itively, the efficiency of  $H_2$ -mediated electromicrobial production trends downwards, moving from  
97 plateau to plateau, with increasing transmembrane voltage. (**Fig. S1A**). While the amount of  
98 energy stored per proton is lower at lower  $\Delta U_{\text{membrane}}$ , energy quantization losses are also re-  
99 duced.

100 This framework estimates the electron requirement for isopropanol and butanol synthesis by the  
101 Bionic Leaf ( $H_2$ -EMP using the Calvin Cycle (CBB) for *in vivo*  $CO_2$ -fixation) to be  $25_{-3.5}^{+0.5}$  and  
102  $31_{-3.5}^{+0.5}$  respectively. The maximum electricity to isopropanol conversion efficiency of the Bionic  
103 Leaf ( $\Delta U_{\text{cell}} = 2$  V [14]) is estimated to be  $41.6_{-5.1}^{+0.8}\%$  (**Bar C** in **Fig. 3**). This result just exceeds  
104 the maximum reported electrical to isopropanol efficiency of  $39 \pm 2\%$  [14]. This match suggests  
105 that  $CO_2$ -fixation and biofuel synthesis in *R. eutropha* are already highly optimized.

106 How high could the efficiency go? Switching the product to butanol affords an improvement in  
107  $H_2$ -EMP efficiency to  $44.6_{-4.5}^{+0.7}\%$  and a significant improvement in ease of product recovery (**Bar**

108 **D** in **Fig. 3**). If the anode and cathode bias voltages could be reduced to zero, the efficiency of  
109 H<sub>2</sub>-EMP electrical to 1-butanol efficiency could rise as high as 72.5<sup>+1.1</sup><sub>-7.4</sub>% (**Bar I**). However, given  
110 the already low cobalt phosphate electrode overpotentials [37] in the Bionic Leaf, raising the effi-  
111 ciency by this route might be impractical.

112 Could the efficiency of EMP be increased by altering just the biological part of the system? Fol-  
113 lowing intuition, electrical to fuel efficiency increases with decreasing NAD(P)H, ATP and Fd re-  
114 quirements for CO<sub>2</sub> to biofuel conversion (**Fig. S3A-D**). The efficiencies of the six known naturally-  
115 occurring carbon fixation pathways and the synthetic CETCH pathway are shown in **Fig. 3**. The  
116 CETCH [35] cycle matches the efficiency of CBB (**Bar E**), while the naturally-occurring CO<sub>2</sub>-  
117 fixation cycles 3HP-4HB (**Bar F**), rTCA (**Bar G**) and WL (**Bar H**) all perform better than the  
118 Calvin cycle, raising the electrical to fuel efficiency as high as 55.3<sup>+0.1</sup><sub>-1.1</sub>%.

119 While the rTCA cycle and Wood-Ljungdahl pathway are both typically found in anaerobic and  
120 micro-aerophilic organisms, recent advances in compartmentalization in synthetic biology [38–40]  
121 could enable the implementation of these highly efficient pathways in synthetic organisms that  
122 operate under ambient atmospheric conditions and enable use of O<sub>2</sub> as a metabolic terminal elec-  
123 tron acceptor.

## 124 H<sub>2</sub>-mediated Electromicrobial Production Reaches Its Maximum Effi- 125 ciency in Large Scale Systems

126 In principle, the efficiency of a electromicrobial production system could be independent of the  
127 specific activity of the carbon fixation pathway used (how many CO<sub>2</sub> molecules are fixed each  
128 second by each gram of enzyme). Fixing more CO<sub>2</sub> and storing more energy might simply require  
129 more cells operating in parallel. However, distributing electrical power through a H<sub>2</sub> mediator  
130 could pose energetic, geometric and safety challenges [31]. To assess these challenges, we built  
131 models of H<sub>2</sub>-transport by diffusion and agitation.

132 The difficulty of H<sub>2</sub>-transport is determined by the number and volume of cells needed to store  
133 the H<sub>2</sub>-current,  $I_{\text{H}_2}$ , produced by the cell current ( $\xi_{\text{eH}_2}$  is the Faradaic efficiency of H<sub>2</sub> produc-  
134 tion, typically close to 1),

$$I_{\text{H}_2} = \xi_{\text{eH}_2} I_{\text{cell}}. \quad (5)$$

135 As hydrogenase enzymes are much faster than any carboxylating enzyme, the CO<sub>2</sub> fixation rate is  
136 the limiting factor in electron demand per cell. The rate of electron uptake by each cell depends  
137 on the number of electrons,  $\nu_{\text{ef}}$ , and carbon atoms fixed,  $\nu_{\text{Cf, fix}}$  (not just the number incorpo-  
138 rated,  $\nu_{\text{Cf}}$ ), to synthesize each fuel molecule; and the rate and number of carbon-fixing enzymes,  
139  $r_{\text{fix}}$  and  $\nu_{\text{fix}}$  (**SI Text 3**),

$$\dot{\nu}_e = \nu_{\text{ef}} r_{\text{fix}} \nu_{\text{fix}} / \nu_{\text{Cf, fix}}. \quad (6)$$

140 Thus, the total number and volume of cells needed to store the H<sub>2</sub>-current ( $n_{\text{cells}}$  is the cell den-  
141 sity),

$$N_{\text{cells}} = I_{\text{H}_2} / e \dot{\nu}_e, \quad (7)$$

$$V_{\text{cells}} = N_{\text{cells}} / n_{\text{cells}}. \quad (8)$$

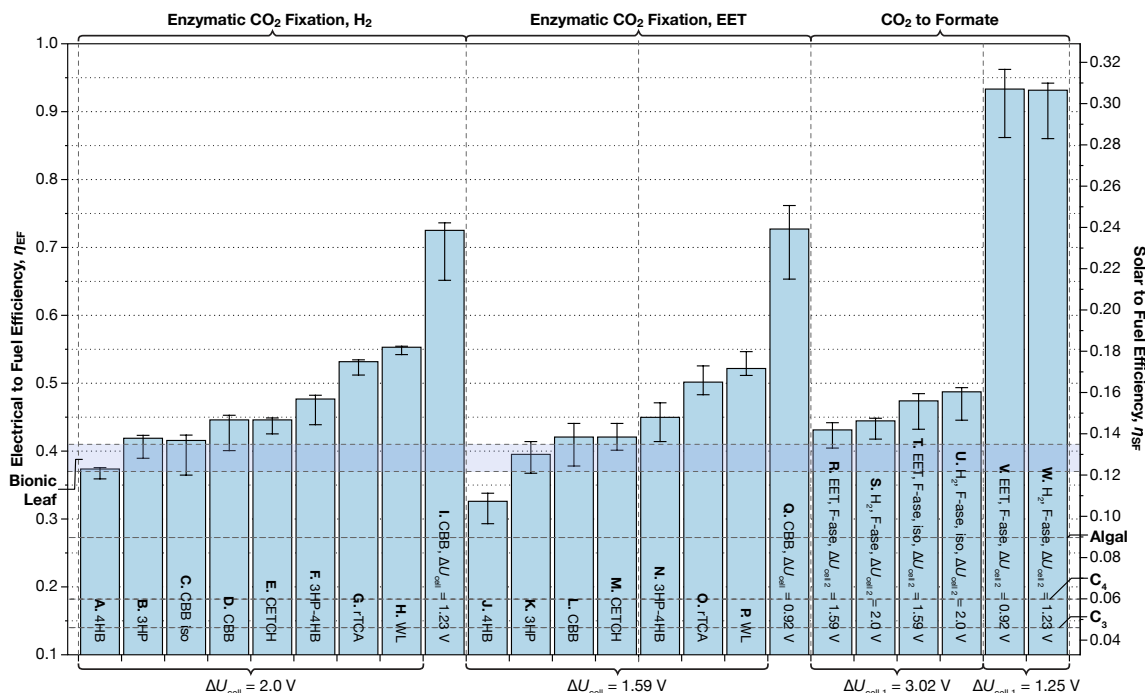

Figure 3: Projected lab-scale electrical and solar to biofuel efficiency of electromicrobial production schemes. The right axis is calculated by assuming a solar to electrical conversion efficiency of 32.9%, the maximum efficiency of a single junction Si solar PV [41]. Bars R to U assume a Faradaic efficiency of CO<sub>2</sub> to formate reduction of 80%, while bars V and W assume 100% Faradaic efficiency. Whole cell voltages were calculated from the minimum redox potentials of H<sub>2</sub> and the Mtr EET complex [26] midpoint redox potentials, and from bias voltages reported by [13], [14], and [23]. Metabolic pathway data can be found in **Table S2**. All efficiencies are for butanol production, except where noted as isopropanol (iso). This plot can be recreated with the `fig-co2fixation.py` program and `fig-co2fixation.csv` input file in the REWIREDCARBON package. 4HB = 4-hydroxybutyrate cycle; 3HP = 3-hydroxypropionate bicycle; CBB = Calvin-Benson-Bassham cycle; CETCH = (CoA)/ethylmalonyl-CoA/hydroxybutyryl-CoA; 3HP-4HB = 3-hydroxypropionate 4-hydroxybutyrate bicycle; rTCA = reductive tricarboxylic acid cycle; WL = Wood-Ljungdahl pathway.

142 H<sub>2</sub> could be transported by diffusion from the headspace of a reactor (where it is at a partial  
 143 pressure  $P_{H_2}$ ) without any additional energy input into the system (**Fig. 4A**). In order to achieve  
 144 the high concentration gradient needed to drive rapid diffusion of H<sub>2</sub> ( $D_{H_2}$  and  $k_{H_2}$  are the diffu-  
 145 sion and solubility coefficients for H<sub>2</sub> respectively), the cell culture has to be spread into a film  
 146 with a height no greater than, and an area no less than (**SI Text 4**),

$$h_{\text{film}} \leq \sqrt{((2P_{H_2} D_{H_2} N_A) / (k_{H_2} n_{\text{cells}} \dot{\nu}_e))}, \quad (9)$$

$$A_{\text{film}} \geq \frac{\xi_{eH_2} k_{H_2}^{1/2} P_{e, \text{avail}}}{e \Delta U_{\text{cell}} (2\dot{\nu}_e n_{\text{cells}} P_{H_2} D_{H_2} N_A)^{1/2}}. \quad (10)$$

147 The area of a electromicrobial production system supplied by H<sub>2</sub>-diffusion scales linearly with in-  
 148 put power while the film thickness remains the same. *R. eutropha* is typically grown under an  
 149 atmosphere containing H<sub>2</sub>, O<sub>2</sub> and CO<sub>2</sub> at a ratio of 8:1:1 [42]. At the laboratory-scale, the H<sub>2</sub>  
 150 partial pressure is usually restricted to 5% of a total pressure of 1 atmosphere in order to reduce  
 151 the risks of H<sub>2</sub> explosion [42]. If supplied by a solar photovoltaic (PV), the area of the film rela-

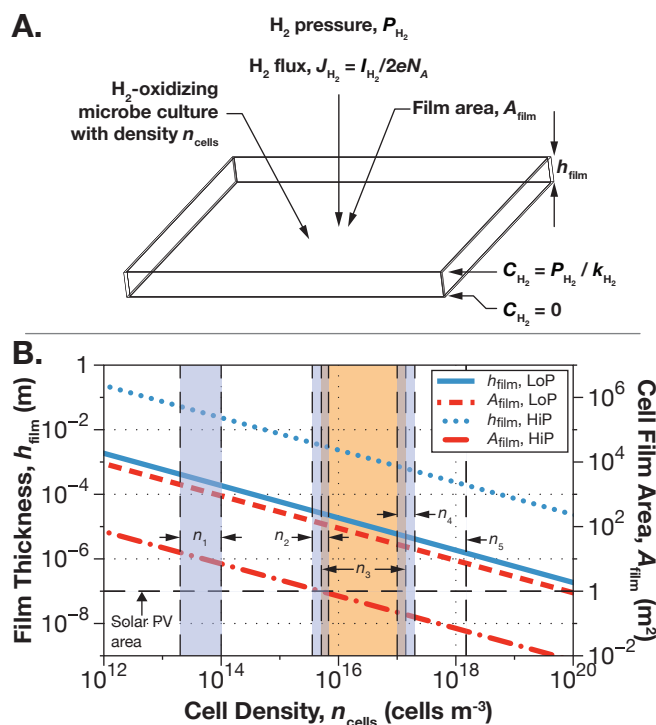

Figure 4: H<sub>2</sub>-transport by diffusion to enable scale up of H<sub>2</sub>-mediated electromicrobial production systems using the Calvin cycle (CBB) to convert CO<sub>2</sub> to butanol. **(A)** Geometry for H<sub>2</sub> mixing by diffusion. **(B)** Maximum height of cell culture that can be supplied with H<sub>2</sub> by diffusion and corresponding area of culture needed to convert 330 W of electrical power (produced by a perfectly efficient 1 m<sup>2</sup> single-junction Si solar PV illuminated by 1,000 W of solar power) at H<sub>2</sub> partial pressures of 5066 Pa (5% of atmospheric pressure; LoP) and 81 MPa (80% of 1000× atmospheric pressure; HiP). Five important cell density regimes are noted in panel **B**:  $n_1$ : laboratory grown cultures of *E. coli* in exponential phase;  $n_2$ : cyanobacteria grown to maximum density;  $n_3$ : cultures of *E. coli* at saturating density;  $n_4$ : H<sub>2</sub>-oxidizing microbes grown to maximum density; and  $n_5$ : and saturating cultures of industrially-grown yeast (**SI Text 5**) and **Table S5**. Panel **B** can be recreated with the `fig-h2diffusion.py` programs and corresponding input file in the REWIREDCARBON package. To ease interpretation of panel **B** we have re-drawn this panel as two separate panels, each with a single curve representing the area and thickness of the cell culture film at each pressure in **Fig. S6**.



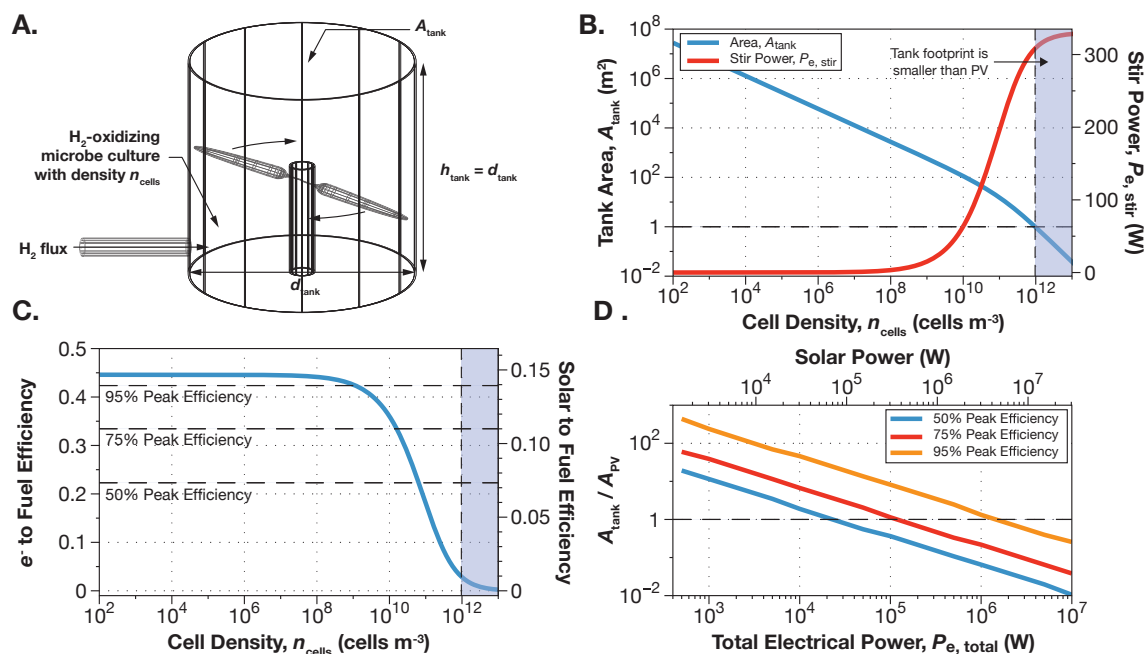

Figure 5: Scale up of  $\text{H}_2$ -mediated electromicrobial production systems using the Calvin cycle (CBB) to convert  $\text{CO}_2$  to 1-butanol. (A) Geometry for mixing  $\text{H}_2$  by agitation. (B) As cell density is increased to reduce system footprint, the power required to mix  $\text{H}_2$  by agitation increases, eventually consuming all of the 330 W available to the system, (C) reducing the electricity to fuel efficiency to zero. (D) But, the system footprint to PV area ratio at which the system achieves 50, 75 and 95% of its peak efficiency falls with increasing input power to the system (and solar PV area). Panels B to D in this plot can be recreated with the `fig-h2agitation-B` to `D.py` programs and the corresponding input files in the `REWIREDCARBON` package. Note that the cell densities shown here are much lower than those highlighted in Fig. 4.

152 tive to the solar PV area,  $A_{PV}$ , will remain constant. A plot of film thickness and area versus cell  
 153 culture density is shown for two systems supplied by a  $1 \text{ m}^2$  solar PV in Fig. 4B: the first with a  
 154 headspace  $\text{H}_2$  partial pressure of 5,066 pascals (Pa) (5% of 1 atmosphere;  $\text{O}_2$  and  $\text{CO}_2$  will both  
 155 be at a partial pressure of 633.25 Pa and the system will be balanced with  $\text{N}_2$ ), and the second  
 156 with a  $\text{H}_2$  partial pressure of  $81 \times 10^6 \text{ Pa}$  (80% of 1,000 atmospheres;  $\text{O}_2$  and  $\text{CO}_2$  will both be at  
 157 a partial pressure of  $10.1 \times 10^6 \text{ Pa}$ ).

158 For the ambient pressure system, the film area (and potential footprint of the system) is greater  
 159 than the area of the PV supplying it for even the highest cell densities seen in bio-industrial ap-  
 160 plications. At the highest reported autotrophic density for *R. eutropha* (density region 4;  $n_4$   
 161 [43]), the film area is between 20 and  $28 \text{ m}^2$ . The large film area requirement for  $\text{H}_2$ -transport  
 162 by diffusion at ambient pressures may not be insurmountable. Bioreactors with high internal ar-  
 163 eas but relatively small footprints could be constructed by stacking planar cell layers on top of  
 164 one another, or using hollow fibers in which cells are immobilized on the walls of the fiber and  
 165 reactant gases are flowed along its inner and outer surfaces [44].

166 Furthermore, by increasing the  $\text{H}_2$  partial pressure to  $81 \times 10^6 \text{ Pa}$ , the cell film area can be re-  
 167 duced to  $1 \text{ m}^2$  by a density of  $\approx 5 \times 10^{15} \text{ cells m}^{-3}$ , inside the range of typical cyanobacterial cell

168 densities (density region **2**;  $n_2$ ).

169 H<sub>2</sub>-diffusion systems could enable very high efficiency, but may come at the cost of high initial  
170 expenditure, complexity, maintenance, potential for H<sub>2</sub> escape, and difficulty in removing prod-  
171 uct.

172 Intuitively, agitation allows H<sub>2</sub>-transport without the need for extreme system geometries, high  
173 pressures or both, at the expense of power input. The input power to the electrochemical cell is  
174 the total available electrical power,  $P_{e, \text{total}}$ , minus any power needed to agitate the system,

$$P_{e, \text{avail}} = P_{e, \text{total}} - P_{e, \text{stir}}. \quad (11)$$

175 We considered a cylindrical stirred tank of cells that continuously distributes H<sub>2</sub> supplied by a  
176 sub-surface pipe (**Fig. 5A**). We numerically solved a set of coupled equations linking H<sub>2</sub> produc-  
177 tion, consumption, gas transfer rate, cell culture volume, and the power required for gas mixing  
178 through an iterative algorithm in the REWIREDCARBON package using a formalism compiled by  
179 Van't Riet [45] until a self consistent set of solutions were found (**SI Text 6**). The solution to  
180 these equations for a system supplied with 330W of electrical power from a 1 m<sup>2</sup> solar PV are  
181 plotted in **Figs. 5B** to **5D**.

182 At low cell densities and high system footprints (and hence volumes), the power required to trans-  
183 port H<sub>2</sub> is low, while at low volumes the effort to stir is much greater (**Fig. 5B**). Intuitively, any-  
184 one who has grown cell culture understands that it is much easier to agitate a large cell culture  
185 (*e.g.* a 1 L flask) than a smaller culture (*e.g.* a 200  $\mu$ L well in a 384-well plate). This creates a  
186 conundrum,  $P_{e, \text{stir}}$  can be minimized, but at the expense of a tank footprint much larger  $A_{\text{PV}}$ .  
187 Or, the tank footprint can be reduced to less than  $A_{\text{PV}}$ , but at the expense of diverting more and  
188 more solar power to mixing H<sub>2</sub> (**Fig. 5B**). This means that the efficiency of the electromicrobial  
189 production system (**Fig. 5C**) drops precipitously from its maximum potential value to almost  
190 zero as the footprint of the system is reduced to allow it to fit under the solar PV supplying it.

191 The footprint-efficiency dilemma can be resolved by operating at higher input power. We calcu-  
192 lated the system footprint to PV area ratio ( $A_{\text{tank}}/A_{\text{PV}}$ ) at which the system achieves 50%, 75%,  
193 and 95% of its maximum potential efficiency in **Fig. 5D**. For small scale systems (500 to 10<sup>4</sup> W  
194 of solar power) footprints of 60 $\times$  to 7 $\times$  the area of the solar PV supplying them are required to  
195 achieve 75% of maximum efficiency. However, for large scales systems exceeding 1.1  $\times$  10<sup>5</sup> W of  
196 electrical power, the system footprint begins to shrink below that of the solar PV supplying it.  
197 Systems supplied by more than 1.1  $\times$  10<sup>6</sup> W of electrical power can achieve 95% of maximum effi-  
198 ciency and still have a footprint smaller than the solar PV supplying them.

## 199 **EET Matches the Efficiency of H<sub>2</sub> and can Achieve High Efficiencies at** 200 **Small Scales**

201 Extracellular electron transfer (EET) could allow scale up of electromicrobial production through  
202 the use of a conductive biofilm to supply electrons to the cell (**Fig. 1C**). Electroactive microbes  
203 can transfer charge to, from and between external substrates like metals and even electrodes at

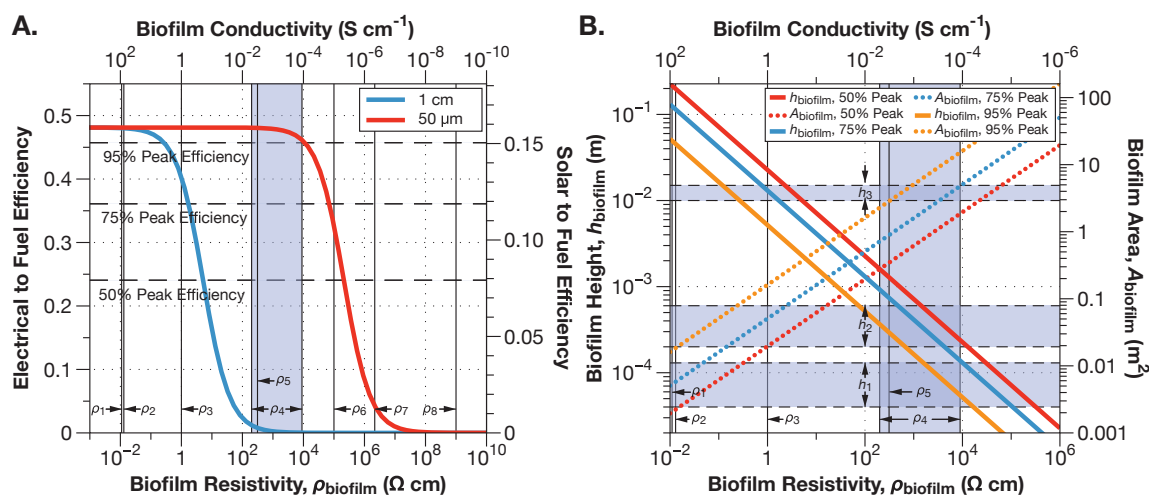

Figure 6: Biofilm resistivity determines efficiency losses in the scale-up of EET-mediated electromicrobial production. The system shown here has an anode bias voltage of 0.47 V, fixes  $\text{CO}_2$  with the Calvin cycle and produces butanol (A) The electrical to fuel efficiency of a electromicrobial production system drops after a threshold resistivity is reached. The thicker the biofilm, the earlier this drop occurs. (B) Maximum biofilm thickness and minimum area needed to achieve 50, 75 and 95% of peak efficiency. This plot can be recreated with the `fig-EETscaleup-A.py` and `B.py` programs and corresponding input files in the REWIREDCARBON package. Representative conductive matrix resistivities and heights:  $\rho_1$ : high conductivity polypyrrole;  $\rho_2$ : individual cable bacteria filaments;  $\rho_3$ : individual *S. oneidensis* nanowires;  $\rho_4$ : bulk *G. sulfurreducens* and *S. oneidensis* biofilm resistivities;  $\rho_5$ : polypyrrole conductive matrix for *S. oneidensis*;  $\rho_6$ : bulk *E. coli* biofilm;  $\rho_7$ : HBr doped polyaniline;  $\rho_8$ : low conductivity polypyrrole;  $h_1$ : *G. sulfurreducens* biofilms;  $h_2$ : polypyrrole conductive matrix for *S. oneidensis*;  $h_3$ : cable bacteria biofilms and individual filaments (SI Text 9) and Tables S3 and S4). To ease interpretation of panel B we have re-drawn this panel as three separate panels, each with a single curve representing the area and thickness of the biofilm at each efficiency in Fig. S7.

204 distances up to a centimeter from the cell surface and use specialized metalloprotein complexes  
 205 that connect the cell surface to the electron transport chain in the inner membrane (Fig. 2B)  
 206 [46–49].

207 The energy landscape of EET has raised concerns about its use in electromicrobial production.  
 208 The redox potentials of the membrane spanning cytochrome complex (Mtr in *S. oneidensis* at  
 209  $\approx -0.1\text{ V}$  vs. the Standard Hydrogen Electrode (SHE) [50]) and the inner membrane electron  
 210 carriers menaquinone ( $-0.0885\text{ V}$  [50]) and ubiquinone ( $0.1\text{ V}$  [50]) are too high to directly reduce  
 211  $\text{NAD}^+$  to  $\text{NADH}$  ( $-0.32\text{ V}$  [51]).

212 Nature suggests that the redox potential mismatch between the inner membrane and  $\text{NAD}^+$  is  
 213 not insurmountable. Today, electroactive iron-oxidizing microbes are able to draw electrons from  
 214 the oxidation of iron minerals at redox potentials from  $+0.7$  to  $\approx 0.1\text{ V}$  to power  $\text{CO}_2$ -fixation  
 215 and autotrophic metabolism [52, 53]. In the distant past it is thought that iron-oxidation powered  
 216 the global carbon cycle [54]. It is speculated that an “uphill pathway” is able to lower the redox  
 217 potential of electrons in the quinone pool to that of  $\text{NAD}^+$  [50].

218 Recently Rowe *et al.* [55] provided compelling evidence that a reverse electron transport chain  
 219 providing an uphill pathway operates in *S. oneidensis*. While the the full complement of genes  
 220 encoding this pathway remains unknown (although some parts have been found [55–58]), this

221 pathway is proposed to operate by directing part of a cathodic current downhill in energy to a  
 222 terminal electron acceptor and pumping protons across the inner membrane. The energy stored  
 223 in the proton gradient is used to power  $\text{NAD}^+$  reduction and ATP production. A model for elec-  
 224 tron uptake by EET is shown in **Fig. 2B**.

225 Due to the need to sacrifice some current to generate a proton gradient for  $\text{NAD}^+$  (and possibly  
 226 Fd) reduction, the number of electrons needed to produce the NADH, Fd and ATP for synthesis  
 227 of a single fuel molecule through EET is higher than in  $\text{H}_2$ -oxidation (a full derivation is included  
 228 in **SI Text 7**),

$$\begin{aligned} \nu_{\text{ef, EET}} = & \\ & 2\nu_{\text{f, NADH}} + 2\nu_{\text{f, Fd}} \\ & + \nu_{\text{f, ATP}} \frac{\text{ceil}(\Delta G_{\text{ATP/ADP}}/e\Delta U_{\text{membrane}})}{\text{floor}((U_{\text{Q}} - U_{\text{Acceptor}})/\Delta U_{\text{membrane}})} \\ & + 2\nu_{\text{f, NADH}} \frac{\text{ceil}(U_{\text{NADH}} - U_{\text{Q}}/\Delta U_{\text{membrane}})}{\text{floor}((U_{\text{Q}} - U_{\text{Acceptor}})/\Delta U_{\text{membrane}})} \\ & + 2\nu_{\text{f, Fd}} \frac{\text{ceil}(U_{\text{Fd}} - U_{\text{Q}}/\Delta U_{\text{membrane}})}{\text{floor}((U_{\text{Q}} - U_{\text{Acceptor}})/\Delta U_{\text{membrane}})}. \end{aligned} \quad (12)$$

229 However, counterintuitively, EET-mediated electromicrobial production is not dramatically less  
 230 efficient than  $\text{H}_2$ -mediated electromicrobial production (**Fig. 3**). While the number of electrons  
 231 needed to produce a molecule of fuel is higher, the whole-cell voltage in an EET-mediated system  
 232 is lower than in a  $\text{H}_2$ -mediated system ( $\Delta U_{\text{cell}} \geq 1.23 \text{ V}$  for  $\text{H}_2$  but only  $\geq 0.92 \text{ V}$  for EET) as  
 233 the redox potential of Mtr is much lower than  $\text{H}_2$  [26]. Furthermore, the bias voltages at lab-scale  
 234 remain approximately the same [7], meaning more total current is available to an EET-mediated  
 235 system. However, EET-mediated electromicrobial production is approximately twice as sensitive  
 236 to changes in transmembrane voltage than a  $\text{H}_2$ -mediated system (**Fig. S1**).

237 The scale up of EET-mediated electromicrobial production is potentially much easier than  $\text{H}_2$ -  
 238 EMP. We built a model of scale up for an EET-mediated system assuming that the dominant  
 239 source of overpotential is the resistivity of the biofilm. We assumed that the biofilm could be  
 240 modeled as an Ohmic resistor, so that the bias voltage needed to transport electrons across it is,

$$\Delta U_{\text{biofilm}} = \rho_{\text{biofilm}} h_{\text{biofilm}} I_{\text{cell}}/A_{\text{biofilm}}. \quad (13)$$

241 We developed a set of five coupled equations to solve for the cell current  $I_{\text{cell}}$ , the bias voltage  
 242 needed to drive current across the biofilm  $\Delta U_{\text{biofilm}}$ , the area of the biofilm  $A_{\text{biofilm}}$ , the total  
 243 number of cells in the biofilm  $N_{\text{cells}}$ , and the volume of the biofilm  $V_{\text{biofilm}}$  in **SI Text 8**. These  
 244 equations were solved numerically and the results shown in **Fig. 6**. Unlike agitation based sys-  
 245 tems, the energy cost of electron transport by EET scales linearly with system size: for a given  
 246 biofilm resistivity, the ratio of the areas of the biofilm and the solar panel supplying it with elec-  
 247 tricity remains constant. Moreover, there is no obvious penalty for operating small-scale systems  
 248 as there is with agitation.

249 At low resistivities (high conductivities) the biofilm overpotential is small, allowing a conductive  
 250 matrix system to achieve close to its maximum possible efficiency, set only by the thermodynamic

251 minimum voltages and any non-biofilm bias in the system (**Fig. 6A**). However, above a critical  
252 resistivity, the efficiency drops precipitously. For a  $50\ \mu\text{m}$  thick film, the efficiency starts to drop  
253 below 95% of maximum at a resistivity of  $\approx 10^5\ \Omega\ \text{cm}$ , considerably higher than the commonly  
254 reported resistivities of *Geobacter sulfurreducens* and *S. oneidensis* biofilms ( $\rho_4$  in **Fig. 6A**, **SI**  
255 **Text 9**) [59–61]. Note that the peak efficiency shown in **Fig. 6A** exceeds that shown in **Fig. 3**  
256 **Bar L** as we assume only anode bias.

257 As the resistivity of the conductive matrix increases, its thickness must decrease and its area in-  
258 crease in order to maintain a given efficiency. In contrast to a  $50\ \mu\text{m}$  film, a 1 cm thick film suffers  
259 a drop in efficiency to 50% of maximum at a resistivity of only  $\approx 10\ \Omega\ \text{cm}$ , well below the resistiv-  
260 ity range of *G. sulfurreducens* and *S. oneidensis* biofilms [59–61], but above the reported resistivi-  
261 ties of individual *S. oneidensis* nanowires ( $\rho_3$  in **Fig. 6A**) [62] and individual filaments produced  
262 by the cable bacterium *Thiofilum facile* ( $\rho_2$  in **Fig. 6A**) [63].

263 **Fig. 6B** shows the maximum conductive matrix thickness and minimum area able to achieve a  
264 given fraction of peak efficiency as a function of resistivity. If 50% of peak efficiency is accept-  
265 able, then the biofilm area can be constrained to  $1\ \text{m}^2$  (equal to that of the solar PV supply-  
266 ing it) if the biofilm resistivity is  $2,650\ \Omega\ \text{cm}$ , well within the range of *G. sulfurreducens* and *S.*  
267 *oneidensis* biofilm resistivities. However, the corresponding film thickness is  $440\ \mu\text{m}$ , about  $3\times$   
268 the height of most commonly observed *G. sulfurreducens* and *S. oneidensis* biofilms (although  
269 Renslow *et al.* did observe *S. oneidensis* films as thick as  $450\ \mu\text{m}$ ). However, artificial polypyr-  
270 role conductive ECMs have been produced that are as thick as  $600\ \mu\text{m}$ , and have resistivities as  
271 low as  $312\ \Omega\ \text{cm}$  ( $\rho_5$  in **Fig. 6**). Were the film area increased to  $3.4\ \text{m}^2$ , the film thickness could  
272 be reduced to  $130\ \mu\text{m}$ , within the range of commonly observed *G. sulfurreducens* and *S. oneiden-*  
273 *sis* biofilm thicknesses. The biofilm resistivity would only need to be  $29,000\ \Omega\ \text{cm}$ , above that of  
274 many conductive biofilms, perhaps allowing some conductivity to be sacrificed to enable increased  
275  $\text{CO}_2$  inflow or biofuel outflow.

276 On the other hand, if a thickness of  $130\ \mu\text{m}$  and resistivity of  $1,600\ \Omega\ \text{cm}$  are simultaneously achiev-  
277 able, 95% of peak efficiency can be achieved if a  $6.4\ \text{m}^2$  biofilm area is acceptable. If a  $1\ \text{m}^2$  biofilm  
278 with a resistivity  $38\ \Omega\ \text{cm}$  and a thickness of  $830\ \mu\text{m}$  could be produced, 95% of peak efficiency  
279 could be achieved.

280 If a biofilm could be produced with a 1 cm thickness (within the range of biofilm thickness pro-  
281 duced by cable bacteria;  $h_3$  in **Fig. 6**), a resistivity of  $5\ \Omega\ \text{cm}$  (above the resistivity of individual  
282 *S. oneidensis* nanowires, and well above that of individual *T. facile* filaments, but below that of  
283 the minimum resistivity calculated by Polizzi *et al.* of  $30\ \Omega\ \text{cm}$  [64]), and an area of only  $0.044\ \text{m}^2$   
284 then 50% of maximum efficiency could be achieved. If a biofilm of 1 cm thickness, with a resistiv-  
285 ity of  $0.26\ \Omega\ \text{cm}$ , and an area of  $0.079\ \text{m}^2$ , 95% of peak efficiency could be achieved.

286 Finally, if 95% of peak efficiency were desired, but only a thin biofilm of  $55\ \mu\text{m}$  with a high resis-  
287 tivity of  $8,952\ \Omega\ \text{cm}$  could be produced, then an area of  $15\ \text{m}^2$  would be required.

## 288 Electrochemical CO<sub>2</sub> Fixation Could Allow Very High Electricity to Fuel 289 Conversion Efficiencies

290 H<sub>2</sub>-oxidation and EET could be an important complement to electrochemical CO<sub>2</sub>-fixation tech-  
291 nologies. Current electrochemical CO<sub>2</sub>-fixation systems typically produce compounds with no  
292 more than two carbons that are often not completely reduced [27]. By contrast, most drop-in fu-  
293 els require at least 2 to 3 carbons, with 8 electrons each.

294 Li *et al.* demonstrated the reduction of formate to isobutanol and 3-methyl-1-butanol (3MB) by  
295 the H<sub>2</sub>-oxidizing microbe *R. eutropha* [21]. While this work relied upon oxidation of formate to  
296 CO<sub>2</sub> and subsequent re-fixation by RuBisCO, recent advances in artificial computational metabolic  
297 pathway could enable enzymatic transformation without reliance upon this bottleneck [65, 66].

298 The efficiency of electrochemical CO<sub>2</sub>-fixation electromicrobial production schemes is set by the  
299 number of electrons  $\nu_{e, \text{add}}$  needed to produce the NAD(P)H, Fd and ATP needed to transform  
300 the primary fixation product to a biofuel; the charge needed to synthesize the primary electro-  
301 chemical CO<sub>2</sub>-fixation product,  $e\nu_{\text{ep}}$ ; the number of carbons in each primary fixation product,  
302  $\nu_{\text{CP}}$ ; the Faradaic efficiency of the first electrochemical reaction,  $\xi_{\text{I1}}$ , (while we are calculating an  
303 upper limit on efficiency we have rarely seen  $\xi_{\text{I1}} > 0.8$  [27]); the efficiency of carbon transfer to  
304 the second cell  $\xi_{\text{C}}$ ; and the Faradaic efficiency in the second cell  $\xi_{\text{I2}}$  (**SI Text 10**),

$$\eta = \frac{P_{e, \text{avail}} E_{\text{fuel}} \xi_{\text{I2}}}{e\nu_{e, \text{add}} \left( \Delta U_{\text{cell 1}} \left( \frac{\nu_{\text{P}} \nu_{\text{ep}} \nu_{\text{CP}} \xi_{\text{I2}}}{\xi_{\text{I1}} \xi_{\text{C}} \nu_{e, \text{add}}} \right) + \Delta U_{\text{cell 2}} \right) P_{\text{input, total}}}. \quad (14)$$

305 Even with only 80% Faradaic efficiency for the conversion of CO<sub>2</sub> to formate, the electrical en-  
306 ergy to butanol conversion efficiency of the formolase artificial metabolic pathway [65] powered  
307 by either H<sub>2</sub>-oxidation or EET exceeds all fully enzymatic CO<sub>2</sub>-fixation pathways with the ex-  
308 ception of the rTCA cycle and Wood-Ljungdahl pathway **Fig. 3**, and suffers no complications of  
309 O<sub>2</sub>-sensitivity.

## 310 Conclusions

311 What combination of electron uptake, electron transport, and carbon fixation is the best for elec-  
312 tromicrobial production? The model of electromicrobial production lets us sketch out a roadmap  
313 for how to proceed with the technology. We outline 10 possible development and deployment sce-  
314 narios that could be pursued in the near and further future in **Table 1** along with their advan-  
315 tages, disadvantages, and suggested niche.

316 This work shows that H<sub>2</sub>-EMP using the Calvin cycle [13, 14], is already highly optimized. This  
317 means that engineering the host microbe (*e.g.* *R. eutropha*) by adjusting expression levels of en-  
318 zymes already encoded in the genome or changing the transmembrane voltage are unlikely to pro-  
319 duce gains of more than a few percentage points in electricity to biofuel conversion efficiency.

| #  | Scenario                                                                                | Advantages                                                                                                                                                                                             | Drawbacks                                                                                                                                                                                                                                                                                                            | Display Item                  |
|----|-----------------------------------------------------------------------------------------|--------------------------------------------------------------------------------------------------------------------------------------------------------------------------------------------------------|----------------------------------------------------------------------------------------------------------------------------------------------------------------------------------------------------------------------------------------------------------------------------------------------------------------------|-------------------------------|
| 1  | Metabolically engineer <i>R. eutropha</i> by adjusting enzyme expression.               | Straightforward genetic engineering.                                                                                                                                                                   | Unlikely to produce significant gains in electricity to biofuel conversion efficiency.                                                                                                                                                                                                                               | Fig. 3 Bars C and D.          |
| 2  | Engineer H <sub>2</sub> -oxidizing chassis with more efficient CO <sub>2</sub> fixation | Significant increase in electrical to biofuel conversion efficiency.                                                                                                                                   | Significant increase in genetic engineering complexity. O <sub>2</sub> -sensitivity (rTCA and WL).                                                                                                                                                                                                                   | Fig. 3 Bars E, F, G, and H    |
| 3  | Engineer H <sub>2</sub> -oxidizing chassis with formate assimilation pathway.           | Significant increase in electrical to biofuel conversion efficiency<br>Less complex genetic engineering.<br>No known O <sub>2</sub> -sensitivity issues.                                               | Increased system complexity due to electrochemical CO <sub>2</sub> reduction.                                                                                                                                                                                                                                        | Fig. 3 Bars S and U           |
| 4  | Deploy H <sub>2</sub> -EMP in large volume stirred tank reactor at ambient pressure.    | Small footprint.<br>Low system complexity.                                                                                                                                                             | Potential for H <sub>2</sub> escape and energy loss.<br>Only efficient at large scales ( $\geq 1$ MW)                                                                                                                                                                                                                | Fig. 5                        |
| 5  | Deploy H <sub>2</sub> -EMP in a diffusional hollow fiber reactor at ambient pressure.   | Efficient at all power scales.                                                                                                                                                                         | High complexity due to large internal surface area.<br>Potential for H <sub>2</sub> escape and energy loss.                                                                                                                                                                                                          | Fig. 4B                       |
| 6  | Deploy H <sub>2</sub> -EMP in a diffusional hollow fiber reactor at high pressure.      | Efficient at all power scales.<br>Significantly reduced internal area compared to ambient pressure case.                                                                                               | Increased complexity due to need to maintain high internal gas pressure.<br>Explosive atmosphere.<br>Potential for H <sub>2</sub> escape and energy loss.                                                                                                                                                            | Fig. 4B                       |
| 7  | Engineer EET chassis with CO <sub>2</sub> -fixation pathway.                            | No volatile intermediate (H <sub>2</sub> ).                                                                                                                                                            | Small efficiency loss compared with H <sub>2</sub> -oxidizing chassis organism.<br>Highly complex genetic engineering.                                                                                                                                                                                               | Fig. 3 Bars L, M, N, O, and P |
| 8  | Engineer EET chassis with a formate assimilation pathway.                               | Potential significant increase in electrical to biofuel conversion efficiency over a chassis using the CBB cycle.<br>Less complex genetic engineering.<br>No known O <sub>2</sub> -sensitivity issues. | Increased system complexity due to electrochemical CO <sub>2</sub> reduction.                                                                                                                                                                                                                                        | Fig. 3 Bars R and T           |
| 9  | Deploy EET-EMP with a conductive extracellular matrix (ECM).                            | No volatile intermediate (H <sub>2</sub> )<br>Potential for low internal area reactor<br>Room for reduction in ECM conductivity to allow CO <sub>2</sub> access and product extraction                 | Small efficiency loss relative to H <sub>2</sub> -transport<br>Potential difficulty in cultivating and maintaining large area ECMs.<br>Product extraction and CO <sub>2</sub> access to the biofilm could compromise conductivity.<br>Engineering biofilm formation poses significant genetic engineering challenge. | Fig. 6                        |
| 10 | Engineering a quantum dot-EET-EMP hybrid.                                               | No volatile intermediate (H <sub>2</sub> ).<br>Potential for extremely low complexity system.                                                                                                          | High complexity of genetic engineering to introduce CO <sub>2</sub> -fixation of any sort to EET-chassis organism.                                                                                                                                                                                                   |                               |

Table 1: Future research and development, and deployment scenarios for electromicrobial production. ECM = Extra-Cellular Matrix.

320 One genetic engineering route to increased electrical to biofuel conversion efficiency (from  $\approx 40\%$   
321 to as high as  $55\%$  at lab scales) is replacement of the familiar Calvin cycle with any one of the  
322 CETCH, 3HP-4HB, rTCA or WL  $\text{CO}_2$ -fixation pathways. This approach is not for the faint  
323 hearted. However, recent impressive progress in engineered the Calvin cycle into *E. coli* makes  
324 this a tantalizing possibility [67, 68]. Furthermore, the need to use  $\text{O}_2$  as a terminal electron ac-  
325 ceptor to achieve maximum efficiency means that the  $\text{O}_2$ -sensitivity of the rTCA and WL path-  
326 ways will need to be mitigated by developing  $\text{O}_2$ -tolerant versions of currently  $\text{O}_2$ -sensitive en-  
327 zymes in these pathways, or sequestering these enzymes inside  $\text{O}_2$ -impermeable compartments  
328 inside the cell.

329 An alternative route to significantly enhanced efficiency is dispense with *in vivo*  $\text{CO}_2$ -fixation and  
330 replace it with *ex vivo* electrochemical  $\text{CO}_2$  reduction and *in vivo* formate assimilation. This ap-  
331 proach is much more genetically tractable and achieves efficiency gains comparable to replacing  
332 the Calvin cycle with the rTCA cycle. Additionally, there is room for further improvement as  
333 new artificial pathways for processing electrochemically fixed  $\text{CO}_2$  are invented. However, this  
334 approach adds further system complexity and potential cost.

335 The optimization of  $\text{H}_2$ -EMP with the Calvin cycle raises the question: is it time to take it out of  
336 the lab? Agitation is the most mature, lowest cost, and most easily implemented technology for  
337 electron transport considered in this article. However, the high energy cost of stirring small vol-  
338 umes means that the smallest increment of storage that can be built is  $\approx 1$  MW, about the size of  
339 a large solar farm. This is very large relative to residential storage needs (the average American  
340 home uses electrical energy at the rate of about  $1.3$  kW), but tiny compared to the production  
341 needs for aviation fuel (when converted to jet fuel with  $\approx 50\%$  efficiency  $1$  MW corresponds to  
342  $\approx 50$  L  $\text{hr}^{-1}$ . A 787-9 consumes fuel at the rate of  $\approx 7,000$  L  $\text{hr}^{-1}$ ).

343 Its not clear that  $\text{H}_2$ -EMP will ever take on batteries for home energy storage.  $\text{H}_2$ -EMP could  
344 operate very efficiently at a small power scale if  $\text{H}_2$  is transported by diffusion. However, this ap-  
345 proach demands a high internal area reactor. This problem can be ameliorated by operating at  
346 high  $\text{H}_2$  pressure, but it is likely that this will increase cost, and incur significant safety risks. We  
347 would be foolish if we dismissed this approach outright, but we believe this analysis highlights  
348 significant technology risks.

349 Counter to intuition, the efficiency of EET-EMP using a reverse electron transport chain could  
350 almost match that  $\text{H}_2$ -mediated electromicrobial production with laboratory overpotentials. Ad-  
351 ditionally its possible to grow conductive ECMs with sufficiently high conductivities and thick-  
352 nesses that a high-efficiency, low-footprint, low internal area system could be produced with the  
353 microbes we already have available today. In principle, EET-EMP coupled to a self-assembled  
354 conductive extracellular matrix (ECM) could reduce construction costs; allow us to dispense with  
355 volatile intermediates like  $\text{H}_2$ , reducing safety concerns; and allow operation in an ambient at-  
356 mosphere, potentially dramatically reducing operating costs as well. Furthermore, there is no  
357 obvious penalty for operating small-scale systems, meaning that EET-EMP could enable highly  
358 distributed energy storage. However, as of today there is no easily genetically-engineered microbe  
359 capable of both electron uptake by EET and  $\text{CO}_2$  fixation, meaning that this would need to be  
360 created. It is unclear if the reductions in cost and system complexity are worth the trade-off in  
361 the amount of complex microbe engineering that would be needed for such a feat. As of today,



362 we are unaware of the full complement of genes needed for the reverse electron transport chain.  
363 Furthermore, it is unclear how easy it would be for self-assembly of the large area ECMs that this  
364 approach would rely upon. For ECMs with conductivities similar to those produced by *G. sul-*  
365 *furreducens* and *S. oneidensis* several square meters of ECM would be required for every square  
366 meter of solar panel. In the lab, ECMs with areas exceeding only a few square centimeters are  
367 rarely seen [69]. If the very high reported conductivities of cable bacteria ECMs can be repro-  
368 duced, these could reduce the ECM area to only a few square centimeters. Recent developments  
369 in the construction of engineered biofilms [70] suggests that it might be possible to build a biolog-  
370 ically synthesized conductive matrix that is tailored for electrosynthesis with low resistivity, high  
371 thickness, high area, and high accessibility for CO<sub>2</sub> and product egress.

372 Recent developments in coupling photo-chemistry with EET [71] opens up the possibility of con-  
373 structing quantum-dot (QD)-microbe hybrids that directly inject electrons in to the EET com-  
374 plex and then into metabolism. This would allow for the development of a system free of photo-  
375 voltaics and electrodes that could be deployed at potentially extremely low cost. The possibility  
376 of adjusting the redox potential of the Mtr EET complex without significantly reducing efficiency  
377 (**Fig. S5**), along with the tunability of the electronic structure of quantum dots could allow sig-  
378 nificant room for engineering. Here, the potential for significant cost reduction could make for a  
379 significant payoff for the complex genetic engineering required to combine EET and carbon fixa-  
380 tion.

381 The upper limits of efficiency of the EMP schemes presented here exceed those of all known forms  
382 of photosynthesis. Are these gains in efficiency worth pursuing? Can EMP achieve a significantly  
383 higher fraction of its theoretical efficiency in the real world than photosynthesis at an affordable  
384 cost? We cannot guarantee this, but the framework developed here gives us and other investi-  
385 gators the ability to rapidly understand the potential bang for buck of EMP schemes (of which  
386 there are many more than presented here). We hope that with the roadmap this framework gives,  
387 we and others in parallel can rapidly advance the field in multiple directions.

## 388 **Materials and Methods**

389 The theory presented in this work was implemented in the REWIREDCARBON suite of software  
390 developed with PYTHON with the SCIPY [72] and NUMPY [73] libraries. Initial visualization was  
391 implemented with MATPLOTLIB [74]. All computer code is available at [github.com/barstowlab/rewiredcarbon](https://github.com/barstowlab/rewiredcarbon)

## 392 **Acknowledgment**

393 This work was supported by a Career Award at the Scientific Interface from the Burroughs-Wellcome  
394 Fund (to B.B.), Princeton University startup funds (B.B.), Cornell University startup funds (B.B.),  
395 a Cornell Energy Systems Institute (CESI) Postdoctoral Fellowship (A.M.S) and by U.S. Depart-  
396 ment of Energy Biological and Environmental Research grant DE-SC0020179 (B.B.)

## References

397

- 398 [1] Huhne, C., Jones, C., Foster, A. & Ewing, F. UK Renewable Energy Roadmap. Tech.  
399 Rep. (2011). URL [https://assets.publishing.service.gov.uk/government/uploads/  
400 system/uploads/attachment-data/file/48128/2167-uk-renewable-energy-roadmap.  
401 pdf](https://assets.publishing.service.gov.uk/government/uploads/system/uploads/attachment_data/file/48128/2167-uk-renewable-energy-roadmap.pdf).
- 402 [2] Schmalensee, R. The Future of Solar Energy: an Interdisciplinary MIT Study. Tech. Rep.  
403 (2015). URL <http://energy.mit.edu/research/future-solar-energy/>.
- 404 [3] Annual Energy Outlook 2019 with Projections to 2050. Tech. Rep. (2019). URL [https:  
405 //eia.gov/aeo](https://eia.gov/aeo).
- 406 [4] Frew, B. A., Becker, S., Dvorak, M. J., Andresen, G. B. & Jacobson, M. Z. Flexibility mech-  
407 anisms and pathways to a highly renewable US electricity future. *Energy* **101**, 65–78 (2016).
- 408 [5] Shaner, M. R., Davis, S. J., Lewis, N. S. & Caldeira, K. Geophysical constraints on the reli-  
409 ability of solar and wind power in the United States. *Energy & Environmental Science* **11**,  
410 914–925 (2018).
- 411 [6] Cebulla, F., Haas, J., Eichman, J., Nowak, W. & Mancarella, P. How much electrical energy  
412 storage do we need? A synthesis for the U.S., Europe, and Germany. *Journal of Cleaner  
413 Production* (2018).
- 414 [7] Salimijazi, F., Parra, E. & Barstow, B. Electrical Energy Storage with Engineered Biologi-  
415 cal Systems. *Journal of Biological Engineering* **13**, 1–21 (2019). URL [https://jbioleng.  
416 biomedcentral.com/articles/10.1186/s13036-019-0162-7](https://jbioleng.biomedcentral.com/articles/10.1186/s13036-019-0162-7).
- 417 [8] Herzog, H. J. *Carbon Capture* (MIT Press, 2018).
- 418 [9] Committee on Developing a Research Agenda for Carbon Dioxide Removal and Reliable  
419 Sequestration. Negative Emissions Technologies and Reliable Sequestration: A Research  
420 Agenda. Tech. Rep. (2019).
- 421 [10] Rabaey, K. & Rozendal, R. A. Microbial electrosynthesis - Revisiting the electrical route for  
422 microbial production. *Nature Reviews Microbiology* **8**, 706–716 (2010). URL [http://dx.  
423 doi.org/10.1038/nrmicro2422](http://dx.doi.org/10.1038/nrmicro2422).
- 424 [11] Rabaey, K., Girguis, P. & Nielsen, L. K. Metabolic and practical considerations on microbial  
425 electrosynthesis. *Current Opinion in Biotechnology* **22**, 371–377 (2011). URL [http://dx.  
426 doi.org/10.1016/j.copbio.2011.01.010](http://dx.doi.org/10.1016/j.copbio.2011.01.010).
- 427 [12] Lips, D., Schuurmans, J. M., Branco Dos Santos, F. & Hellingwerf, K. J. Many ways towards  
428 ‘solar fuel’: Quantitative analysis of the most promising strategies and the main challenges  
429 during scale-up. *Energy and Environmental Science* **11**, 10–22 (2018). URL [http://dx.doi.  
430 org/10.1039/C7EE02212C](http://dx.doi.org/10.1039/C7EE02212C).
- 431 [13] Torella, J. P. *et al.* Efficient solar-to-fuels production from a hybrid microbial-water-splitting  
432 catalyst system. *Proceedings of the National Academy of Sciences* **112**, 2337–2342 (2015).  
433 URL <http://www.pnas.org/lookup/doi/10.1073/pnas.1503606112>.

- 434 [14] Liu, C., Colón, B., Ziesack, M., Silver, P. & Nocera, D. Water splitting biosynthetic system  
435 with CO<sub>2</sub> reduction efficiencies exceeding photosynthesis. *Science* **352**, 1210–1213 (2016).  
436 URL <https://science.sciencemag.org/content/352/6290/1210>.
- 437 [15] Zhu, X.-G., Long, S. P. & Ort, D. R. What is the maximum efficiency with which pho-  
438 tosynthesis can convert solar energy into biomass? *Current Opinion in Biotechnology*  
439 **19**, 153–159 (2008). URL <https://www.sciencedirect.com/science/article/pii/S0958166908000165>.  
440
- 441 [16] Zhu, X.-G., Long, S. P. & Ort, D. R. Improving Photosynthetic Efficiency for Greater Yield.  
442 *Annual Review of Plant Biology* **61**, 235–261 (2010). URL <http://www.annualreviews.org/doi/10.1146/annurev-arplant-042809-112206>.  
443
- 444 [17] Green, M. A. *et al.* Solar cell efficiency tables (Version 53). *Progress in Photovoltaics: Re-*  
445 *search and Applications* **27**, 3–12 (2019).
- 446 [18] Wijffels, R. H. & Barbosa, M. J. An Outlook on Microalgal Biofuels. *Science* **329**, 796–799  
447 (2010). URL <http://www.ncbi.nlm.nih.gov/pubmed/20705853>.
- 448 [19] Lu, X. *et al.* Biomass logistics analysis for large scale biofuel production: Case study of  
449 loblolly pine and switchgrass. *Bioresource Technology* **183**, 1–9 (2015).
- 450 [20] Adesina, O., Anzai, I. A., Avalos, J. L. & Barstow, B. Embracing Biological Solutions to the  
451 Sustainable Energy Challenge. *Chem* **2**, 20–51 (2017).
- 452 [21] Li, H. *et al.* Integrated Electromicrobial Conversion of CO<sub>2</sub> to Higher Alcohols. *Science* **335**,  
453 1596–1596 (2012).
- 454 [22] Lu, J., Brigham, C. J., Gai, C. S. & Sinskey, A. J. Studies on the production of branched-  
455 chain alcohols in engineered *Ralstonia eutropha*. *Applied Microbiology and Biotechnology* **96**,  
456 283–297 (2012). URL <https://www.ncbi.nlm.nih.gov/pubmed/22864971>.
- 457 [23] Ueki, T. *et al.* Construction of a *Geobacter* Strain With Exceptional Growth on Cathodes.  
458 *Frontiers in Microbiology* **9**, 1512 (2018).
- 459 [24] Tashiro, Y., Hirano, S., Matson, M. M., Atsumi, S. & Kondo, A. Electrical-biological hybrid  
460 system for CO<sub>2</sub> reduction. *Metabolic Engineering* **47**, 211–218 (2018). URL <https://doi.org/10.1016/j.ymben.2018.03.015>.  
461
- 462 [25] Grousseau, E., Lu, J., Gorret, N., Guillouet, S. E. & Sinskey, A. J. Isopropanol production  
463 with engineered *Cupriavidus necator* as bioproduction platform. *Applied Microbiology and*  
464 *Biotechnology* **98**, 4277–4290 (2014).
- 465 [26] Firer-Sherwood, M., Pulcu, G. S. & Elliott, S. J. Electrochemical interrogations of the Mtr  
466 cytochromes from *Shewanella*: Opening a potential window. *Journal of Biological Inorganic*  
467 *Chemistry* **13**, 849–854 (2008). URL <https://www.ncbi.nlm.nih.gov/pubmed/18575901>.
- 468 [27] Appel, A. M. *et al.* Frontiers, Opportunities, and Challenges in Biochemical and Chemical  
469 Catalysis of CO<sub>2</sub> Fixation. *Chemical Reviews* **113**, 6621–6658 (2013). URL <https://pubs.acs.org/doi/10.1021/cr300463y>.  
470

- 471 [28] White, J. L., Herb, J. T., Kaczur, J. J., Majsztrik, P. W. & Bocarsly, A. B. Photons to for-  
472 mate: Efficient electrochemical solar energy conversion via reduction of carbon dioxide. *Jour-  
473 nal of CO<sub>2</sub> Utilization* **7**, 1–5 (2014). URL [http://dx.doi.org/10.1016/j.jcou.2014.05.](http://dx.doi.org/10.1016/j.jcou.2014.05.002)  
474 002.
- 475 [29] White, J. L. *et al.* Light-Driven Heterogeneous Reduction of Carbon Dioxide: Photocatalysts  
476 and Photoelectrodes. *Chemical Reviews* **115**, 12888–12935 (2015). URL [https://pubs.acs.](https://pubs.acs.org/doi/full/10.1021/acs.chemrev.5b00370)  
477 [org/doi/full/10.1021/acs.chemrev.5b00370](https://pubs.acs.org/doi/full/10.1021/acs.chemrev.5b00370).
- 478 [30] Burgdorf, T. *et al.* [NiFe]-Hydrogenases of *Ralstonia eutropha* H16: Modular Enzymes for  
479 Oxygen-Tolerant Biological Hydrogen Oxidation. *Journal of Molecular Microbiology and  
480 Biotechnology* **10**, 181–196 (2005).
- 481 [31] Barstow, B. Molecular Mechanisms for the Biological Storage of Renewable Energy. *Ad-  
482 vanced Science, Engineering and Medicine* **7**, 1066–1081 (2015).
- 483 [32] Agapakis, C. M. *et al.* Insulation of a synthetic hydrogen metabolism circuit in bacteria.  
484 *Journal of Biological Engineering* **4**, 3 (2010).
- 485 [33] Barstow, B. *et al.* A synthetic system links FeFe-hydrogenases to essential *E. coli* sulfur  
486 metabolism. *Journal of Biological Engineering* **5**, 7 (2011).
- 487 [34] Ducat, D. C., Sachdeva, G. & Silver, P. A. Rewiring hydrogenase-dependent redox circuits in  
488 cyanobacteria. *Proceedings of the National Academy of Sciences* **108**, 3941–3946 (2011).
- 489 [35] Schwander, T., von Borzyskowski, L. S., Burgener, S., Cortina, N. S. & Erb, T. J. A syn-  
490 thetic pathway for the fixation of carbon dioxide *in vitro*. *Science* **354**, 900–904 (2016).
- 491 [36] Milo, R., Jorgensen, P., Moran, U., Weber, G. & Springer, M. BioNumbers - the database of  
492 key numbers in molecular and cell biology. *Nucleic Acids Research* **38**, D750–D753 (2010).
- 493 [37] Esswein, A. J., Surendranath, Y., Reece, S. Y. & Nocera, D. G. Highly active cobalt phos-  
494 phate and borate based oxygen evolving catalysts operating in neutral and natural waters.  
495 *Energy & Environmental Science* **4**, 499–504 (2011).
- 496 [38] Chen, A. H., Robinson-Mosher, A., Savage, D. F., Silver, P. A. & Polka, J. K. The Bacterial  
497 Carbon-Fixing Organelle Is Formed by Shell Envelopment of Preassembled Cargo. *PLoS*  
498 *ONE* **8**, e76127 (2013).
- 499 [39] Polka, J. K. & Silver, P. A. A Tunable Protein Piston That Breaks Membranes to Release  
500 Encapsulated Cargo. *ACS Synthetic Biology* **5**, 303–311 (2016).
- 501 [40] Butterfield, G. L. *et al.* Evolution of a designed protein assembly encapsulating its own RNA  
502 genome. *Nature* **552**, 415 (2017).
- 503 [41] Nelson, J. *The Physics of Solar Cells* (Imperial College Press, 2003).
- 504 [42] Brigham, C. J. *et al.* Engineering *Ralstonia eutropha* for Production of Isobutanol from CO<sub>2</sub>,  
505 H<sub>2</sub>, and O<sub>2</sub>. In Lee, J. W. (ed.) *Advanced Biofuels and Bioproducts*, vol. 1, chap. 39, 1065–  
506 1090 (Springer, 2013).

- 507 [43] Kenji Tanaka, T. K. T. K., Ayaaki Ishizaki. Production of poly(D-3-hydroxybutyrate)  
508 from CO<sub>2</sub>, H<sub>2</sub>, and O<sub>2</sub> by high cell density autotrophic cultivation of *Alcaligenes eutrophus*.  
509 *Biotechnology and Bioengineering* **45**, 268–275 (1995).
- 510 [44] Worden, R. M. & Liu, Y. C. Catalytic bioreactors and methods of using same (2017).
- 511 [45] Van't Riet, K. Review of Measuring Methods and Results in Nonviscous Gas-Liquid Mass  
512 Transfer in Stirred Vessels. *Industrial & Engineering Chemistry Process Design and Develop-*  
513 *ment* **18**, 357–364 (1979).
- 514 [46] Sydow, A., Krieg, T., Mayer, F., Schrader, J. & Holtmann, D. Electroactive bacteria–  
515 molecular mechanisms and genetic tools. *Applied Microbiology and Biotechnology* **98**, 8481–  
516 8495 (2014).
- 517 [47] Fredrickson, J. K. *et al.* Towards environmental systems biology of *Shewanella*. *Nature Re-*  
518 *views Microbiology* **6**, 592–603 (2008).
- 519 [48] Shi, L. *et al.* Molecular Underpinnings of Fe(III) Oxide Reduction by *Shewanella oneidensis*  
520 MR-1. *Frontiers in Microbiology* **3**, 50 (2012).
- 521 [49] Shi, L. *et al.* Extracellular electron transfer mechanisms between microorganisms and miner-  
522 als. *Nature Reviews Microbiology* **14**, 651–662 (2016). URL [http://dx.doi.org/10.1038/](http://dx.doi.org/10.1038/nrmicro.2016.93)  
523 [nrmicro.2016.93](http://dx.doi.org/10.1038/nrmicro.2016.93).
- 524 [50] Bird, L. J., Bonnefoy, V. & Newman, D. K. Bioenergetic challenges of microbial iron  
525 metabolisms. *Trends in Microbiology* **19**, 330–340 (2011). URL [http://dx.doi.org/10.](http://dx.doi.org/10.1016/j.tim.2011.05.001)  
526 [1016/j.tim.2011.05.001](http://dx.doi.org/10.1016/j.tim.2011.05.001).
- 527 [51] Thauer, R. K., Jungermann, K. & Decker, K. Energy Conservation in Chemotrophic Anaer-  
528 obic Bacteria. *Bacteriological Reviews* **41**, 100–180 (1977).
- 529 [52] Liu, J. *et al.* Identification and characterization of M to A: A decaheme c-type cytochrome  
530 of the neutrophilic Fe(II)-oxidizing bacterium *Sideroxydans lithotrophicus* ES-1. *Frontiers in*  
531 *Microbiology* **3**, 1–11 (2012).
- 532 [53] Bonis, B. M. & Gralnick, J. A. *Marinobacter subterrani*, a genetically tractable neutrophilic  
533 Fe(II)- oxidizing strain isolated from the Soudan Iron Mine. *Frontiers in Microbiology* **6**,  
534 1–11 (2015). URL <https://www.ncbi.nlm.nih.gov/pubmed/26236300>.
- 535 [54] Canfield, D. E., Rosing, M. T. & Bjerrum, C. Early anaerobic metabolisms. *Philosophical*  
536 *Transactions of the Royal Society B: Biological Sciences* **361**, 1819–1836 (2006). URL [http:](http://rstb.royalsocietypublishing.org/cgi/doi/10.1098/rstb.2006.1906)  
537 [//rstb.royalsocietypublishing.org/cgi/doi/10.1098/rstb.2006.1906](http://rstb.royalsocietypublishing.org/cgi/doi/10.1098/rstb.2006.1906).
- 538 [55] Rowe, A. R. *et al.* Tracking electron uptake from a cathode into *Shewanella* cells: Implica-  
539 tions for energy acquisition from solid-substrate electron donors. *mBio* **9**, 1–19 (2018). URL  
540 <https://mbio.asm.org/content/9/1/e02203-17>.
- 541 [56] Bose, A., Gardel, E. J., Vidoudez, C., Parra, E. A. & Girguis, P. R. Electron uptake by iron-  
542 oxidizing phototrophic bacteria. *Nature Communications* **5**, 3391 (2014). URL [http://dx.](http://dx.doi.org/10.1038/ncomms4391)  
543 [doi.org/10.1038/ncomms4391](http://dx.doi.org/10.1038/ncomms4391).

- 544 [57] Tang, H.-Y., Holmes, D. E., Ueki, T., Palacios, P. A. & Lovley, D. R. Iron Corrosion via  
545 Direct Metal-Microbe Electron Transfer. *mBio* **10**, 1–10 (2019). URL [https://mbio.asm.  
546 org/content/10/3/e00303-19](https://mbio.asm.org/content/10/3/e00303-19).
- 547 [58] Zheng, Z. *et al.* Electrons selective uptake of a metal-reducing bacterium *Shewanella onei-*  
548 *densis* MR-1 from ferrocyanide. *Biosensors and Bioelectronics* **142**, 111571 (2019). URL  
549 <https://doi.org/10.1016/j.bios.2019.111571>.
- 550 [59] Malvankar, N. S., Tuominen, M. T. & Lovley, D. R. Biofilm conductivity is a decisive vari-  
551 able for high-current-density *Geobacter sulfurreducens* microbial fuel cells. *Energy & Envi-*  
552 *ronmental Science* **5**, 5790–5797 (2012).
- 553 [60] Renslow, R. *et al.* Mathematical modeling of extracellular electron transfer in biofilms. In  
554 Beyenal, H. & Babauta, J. (eds.) *Biofilms in Bioelectrochemical Systems*, chap. 9, 281–344  
555 (John Wiley & Sons, Ltd, 2015). URL [https://onlinelibrary.wiley.com/doi/abs/  
556 10.1002/9781119097426.ch9](https://onlinelibrary.wiley.com/doi/abs/10.1002/9781119097426.ch9). [https://onlinelibrary.wiley.com/doi/pdf/10.1002/  
557 9781119097426.ch9](https://onlinelibrary.wiley.com/doi/pdf/10.1002/9781119097426.ch9).
- 558 [61] Yates, M. D. *et al.* Thermally activated long range electron transport in living biofilms.  
559 *Physical Chemistry Chemical Physics* **17**, 32564–32570 (2015).
- 560 [62] El-Naggar, M. Y. *et al.* Electrical transport along bacterial nanowires from *Shewanella onei-*  
561 *densis* MR-1. *Proceedings of the National Academy of Sciences* **107**, 18127–18131 (2010).  
562 URL <http://www.pnas.org/cgi/doi/10.1073/pnas.1004880107>.
- 563 [63] Meysman, F. J. R. *et al.* A highly conductive fibre network enables centimetre-scale electron  
564 transport in multicellular cable bacteria. *Nature Communications* **10**, 4120 (2019).
- 565 [64] Polizzi, N. F., Skourtis, S. S. & Beratan, D. N. Physical constraints on charge transport  
566 through bacterial nanowires. *Faraday Discussions* **155**, 43–62 (2012). URL [https://www.  
567 ncbi.nlm.nih.gov/pubmed/22470966](https://www.ncbi.nlm.nih.gov/pubmed/22470966). NIHMS150003.
- 568 [65] Siegel, J. B. *et al.* Computational protein design enables a novel one-carbon assimilation  
569 pathway. *Proceedings of the National Academy of Sciences* **112**, 201500545 6 (2015).
- 570 [66] Bar-Even, A. Formate Assimilation: The Metabolic Architecture of Natural and Synthetic  
571 Pathways. *Biochemistry* **55**, 3851–63 (2016).
- 572 [67] Antonovsky, N. *et al.* Sugar Synthesis from CO<sub>2</sub> in *Escherichia coli*. *Cell* **166**, 115–125  
573 (2016).
- 574 [68] Gleizer, S. *et al.* Conversion of *Escherichia coli* to Generate All Biomass Carbon from CO<sub>2</sub>.  
575 *Cell* **179**, 1255–1263.e12 (2019).
- 576 [69] Beyenal, H. & Babauta, J. *Biofilms in Bioelectrochemical Systems* (John Wiley & Sons,  
577 2015).
- 578 [70] Nguyen, P. Q., Botyanszki, Z., Tay, P. K. R. & Joshi, N. S. Programmable biofilm-based  
579 materials from engineered curli nanofibres. *Nature communications* **5**, 4945 (2014).

- 580 [71] Rowe, S. F. *et al.* Light-Driven H<sub>2</sub>-Evolution and C=C or C=O Bond Hydrogenation by  
581 *Shewanella oneidensis*: A Versatile Strategy for Photocatalysis by Non-Photosynthetic Mi-  
582 croorganisms. *ACS Catalysis* (2017).
- 583 [72] Virtanen, P. *et al.* SciPy 1.0—Fundamental Algorithms for Scientific Computing in Python.  
584 *arXiv e-prints* arXiv:1907.10121 (2019). 1907.10121.
- 585 [73] van der Walt, S., Colbert, S. C. & Varoquaux, G. The NumPy Array: A Structure for Effi-  
586 cient Numerical Computation. *Computing in Science & Engineering* **13**, 22–30 (2010).
- 587 [74] Hunter, J. Matplotlib: A 2D Graphics Environment. *Computing in Science & Engineering*  
588 **9**, 90–95 (2007).
